# Supplementary material for: NMR-based metabonomic analysis of HUVEC cells during replicative senescence
Source: publisher site journal article supplement (doi:10.18632/aging.102834), 2020-02-17
Supplement: Supplementary file [file aging-v12i4-102834-supplementary-material-SD1.pdf]

SUPPLEMENTARY FIGURES

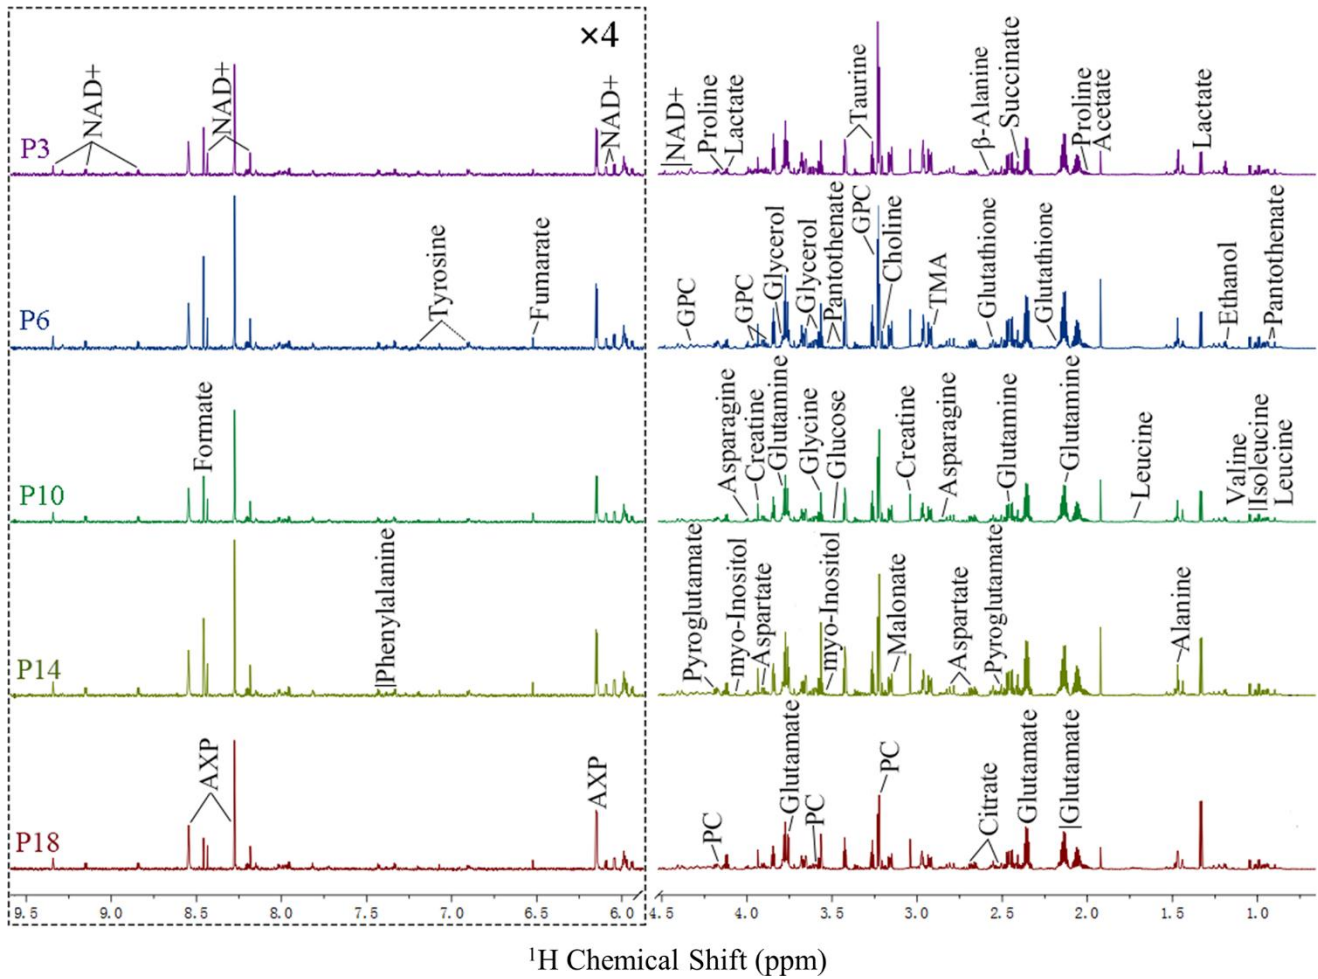

**Supplementary Figure 1. Typical 1D <sup>1</sup>H NMR spectra recorded on aqueous extracts of HUVEC cells at different passages.** Identical vertical scales were applied in all the NMR spectra recorded on a Bruker Avance 850 MHz spectrometer. The water region (4.5-5.6 ppm) was removed. The region of 5.6-9.5 ppm (in the dashed box) was magnified 4 times compared with the corresponding region of 0.5-4.5 ppm for the purpose of clarity. Abbreviations: PC, O-Phosphocholine; GPC, sn-Glycero-3-phosphocholine; AXP, adenine mono/di/tri phosphate; NAD<sup>+</sup>, nicotinamide adenine dinucleotide.

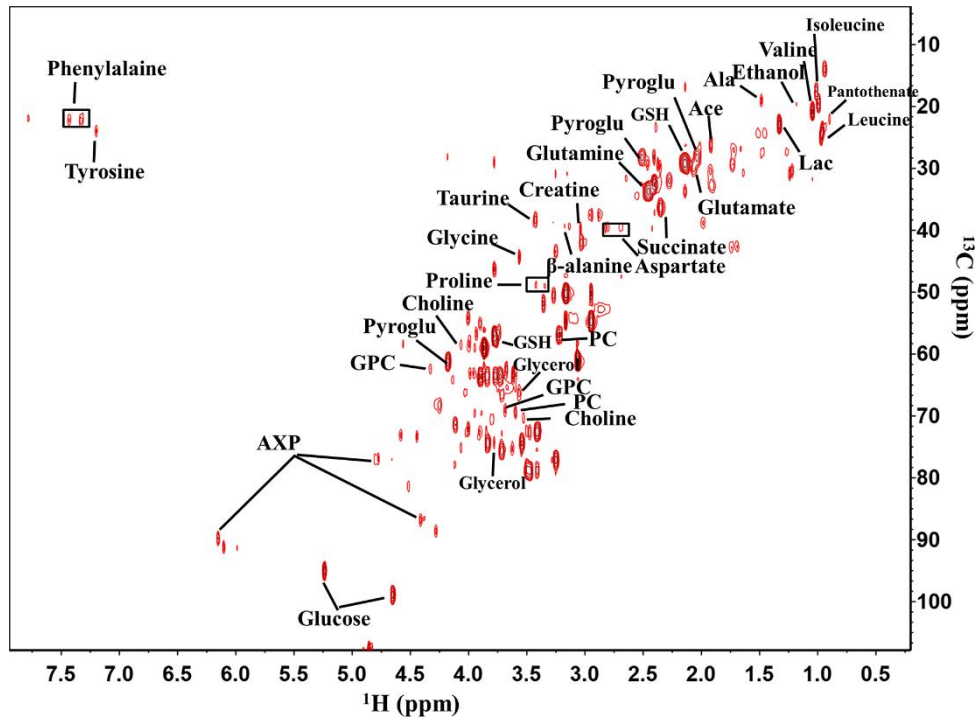

**Supplementary Figure 2. Typical 2D  $^1\text{H}$ - $^{13}\text{C}$  HSQC spectrum of aqueous extracts derived from HUVEC cells.** The spectrum was recorded at 25 °C on a Bruker Advance III 850 MHz NMR spectrometer.

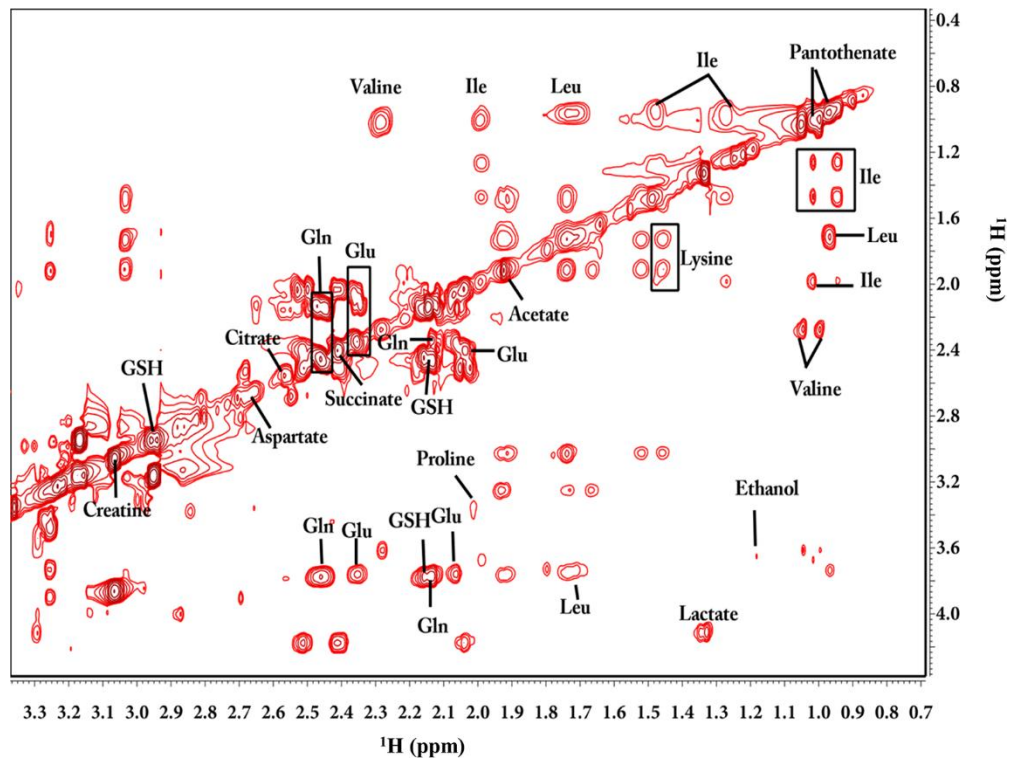

**Supplementary Figure 3. Region (0.7-3.3 ppm) of a typical 2D  $^1\text{H}$ - $^1\text{H}$  TOCSY spectrum of aqueous extracts derived from HUVEC cells.** The spectrum was recorded at 25 °C on a Bruker Advance III 850 MHz NMR spectrometer.

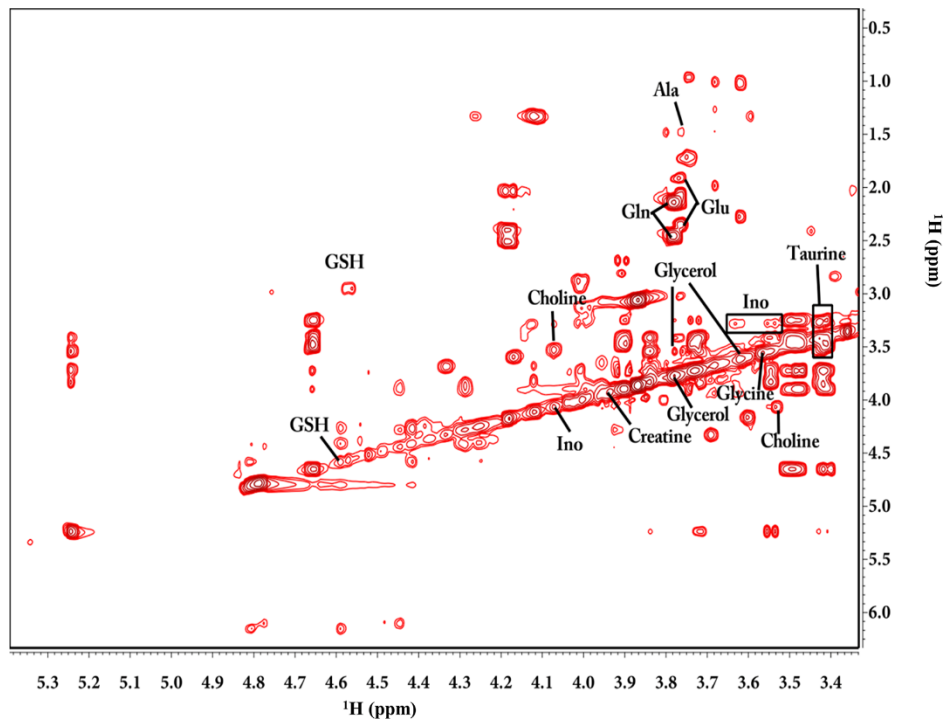

**Supplementary Figure 4. Region (3.4-5.3 ppm) of a typical 2D  $^1\text{H}$ - $^1\text{H}$  TOCSY spectrum of aqueous extracts derived from HUVEC cells.** The spectrum was recorded at 25 °C on a Bruker Advance III 850 MHz NMR spectrometer.

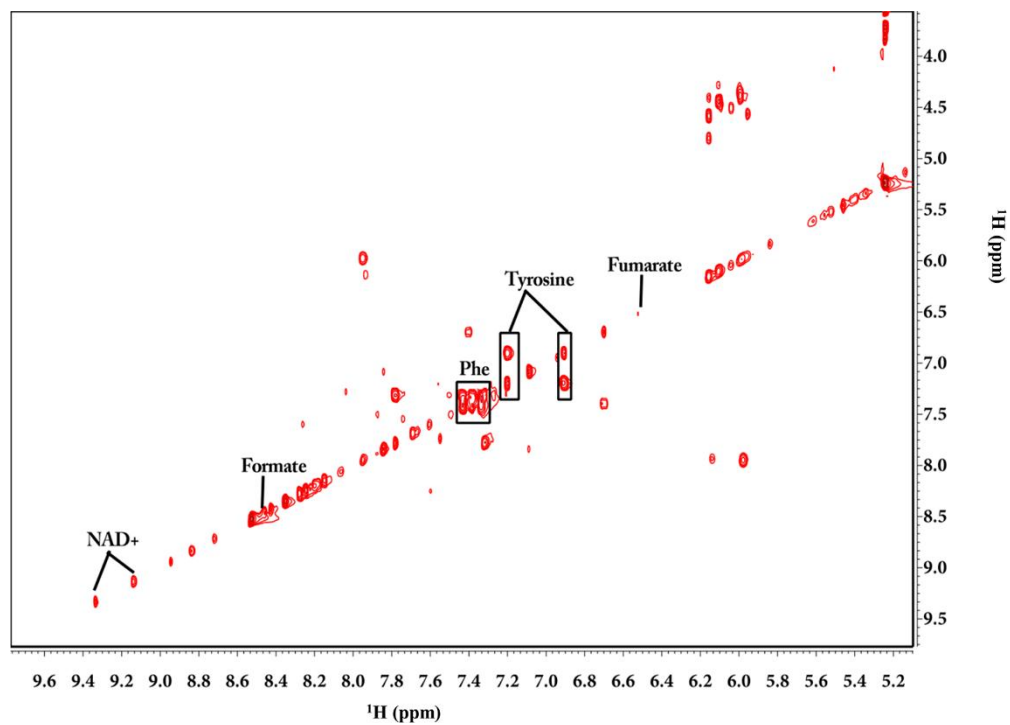

**Supplementary Figure 5. Region (5.2-9.6) ppm of a typical 2D  $^1\text{H}$ - $^1\text{H}$  TOCSY spectrum of aqueous extracts derived from HUVEC cells.** The spectrum was recorded at 25 °C on a Bruker Advance III 850 MHz NMR spectrometer.
